# Supplementary material
Source: PubMed Central journal article supplement (PMC3684051)
Supplement: NIHMS470723-supplement-01.pdf [file NIHMS470723-supplement-01.pdf]

# TG0045

Gene Name: *Kcna10*

Scientist: Dr. Thomas B. Friedman

Organization: National Institute on Deafness & Other Communication Disorders  
(NIDCD)

Accession #: XM\_143471

|                          |                                      |                                                    |            |
|--------------------------|--------------------------------------|----------------------------------------------------|------------|
| Gene name and accession: | NM_001081140 ( <i>Kcna10</i> )       | Date of Submission:                                | 5-19-08    |
| Mutation Type:           | X Standard Knock out                 | Is this gene X-linked?                             | No         |
|                          | <input type="checkbox"/> Conditional | Genetics background of target vector and ES cells: | 129SvEvBrd |

Required Materials:  pKOS clone DNA(s) \_\_\_N/A\_\_\_  
 Targeted ES Cell DNA \_\_\_1D11\_\_\_  
 Genomic Map

## Southern Blot Analysis:

### External/Internal Probe Strategies

|                                        | <u>5' Internal</u> | <u>3' External</u> |
|----------------------------------------|--------------------|--------------------|
| Name of Probe:                         | <b>9+10</b>        | <b>11+12</b>       |
| Restriction Enzyme for Genomic Digest: | <b>StuI</b>        | <b>EcoRI</b>       |
| Predicted Wild-type Band (kb):         | <b>9.7</b>         | <b>7.8</b>         |
| Predicted Mutant Band (kb):            | <b>14.2</b>        | <b>8.7</b>         |
| Probe Size (bp):                       | <b>253</b>         | <b>229</b>         |

## PCR Strategies:

| <b>Wild type-specific (absent in targeted allele)</b> |      | <b>Mutation-specific product (absent in wt)</b> |      |
|-------------------------------------------------------|------|-------------------------------------------------|------|
| 5' Primer Name:                                       | 15   | 5' Primer Name:                                 | 15   |
| 3' Primer Name:                                       | 16   | 3' Primer Name:                                 | GT   |
| Predicted Wild-type Band (bp):                        | 246  | Predicted Wild-type Band (bp):                  | none |
| Predicted mutant band (bp)                            | none | Predicted mutant band (bp)                      | 404  |



TACTTCGGTCAACACAGATCGGGTGGCCCTGAGTGGGTGGGCAGGTGTTTCTCTGCCTGTTTTAAAAAGCAAACAACAAAATGTAGGAAAGTAAAGCAA  
CTTCCCTCCTGTTATGCAGCTAGTGAGAAGCAGAGGCCAAGCTGGGGCTCACATCCCTGAAGTCCACGTACACGCTCCATTTCAGCTGACAACTGGC  
TGTGTGAAATCAGTGGCTAACCGCAAGGTTAAGCAGGAGTAGTTAAAAAGTCATATCCCAATGATAGAAGCTTCTCTAAAAATATTCTTTCTTGCAATT  
TTTTGGGGAATAGCTAGAAAACAACTTACATTTAGGGAGAGGGAGTAGGCAGGAGAATTTTTATAGGAACATAGCCCCCACTCACCTACCTGTCT  
ATTCTACCTGAGGCAGCTAAGTGGGGGTGACCAGCAGGGACATCCAGAGGGGTTCACTTAACACTGAAAACACAAAATAGCAGAATCAGAATCTGC  
ATGGGGACTTGTGAGGACAAGATGTGTAGTCTGTAGACACTTAGTGTCTCTGTAGGGTCTCTAGCTTACACATTTCCATGACCCCATTTGG  
GAGTGGCCAACATGGGAACCTGTACACAGGAATCCCATAGTTAGTTTCCACTATGGAACCCACAAGAGATACGCAATATCCAAACCCAA  
GGCTTCTCATATTTTCCCTGGCGTCTAGAAAACCTGTCACCATAGAGACAGATGCACCCTTCTCTCCAGGCAAATAGGGAGGCAACAGGGGCCCTTAA  
TGCACAAACCTAAGAGGTCCAGGGAAAAGAATCCAAGAGACCTTTTTCTAGCTGACTTACAAAAGTAAAATTATTTTCCCAAGATCAGTAGGTTCTG  
GTCCCACTGATAATAGCAGCTGAAGCTGTAAGCCTCACATTGCTACCAGAATGAATTAATCTGGGCTCATTTTTCGGCATTGTTGCTGTACTCAGG  
TTTAAATGAAAAGAGCTTGTGCCTGCATCTTTCCATCTCTTTCAGAAAGATAGCTTTGTCTTGGAGTCCACAGGGAGAGACACACTGCCACGC  
TGTGCCCATCGACACTCTAACAAGGAAGAGATCCATGTGACCAGCCATCTGAGCCCCCTCCAGTCTCTCTGCCTTCTATTGCTGCAAGCAACAGAACA  
TGCTCCTGTTCCAAAGAGGCAAAAAGATTAAGTTGGAGAAAAGGGGCCAGACACCCCTGGAATAGAAAACATCTGTGCAGTGTGGGTGGTGTGCAGGAGT  
CTGTCCCTATGTATCTGCATATGTGCTCGGATGTCTGGTAATTAATGTGTGTAATATACATATGTCTATGAGTATTTGTACAAGAAGGCCACACATGTGT  
TATGTGTGGGCATATGTTGTTCTGCATGCTTAGTGTGTGTGTGTGTGTGTGTGTGTGTGTGTGTGTGTGTGTGTGTGTGTGTGTGTGTGTGTGTGT  
TGAAGTACAGTGCAGCATCAGCATGTGGGTTCGCTATTGTGGAATGAGGATAATGGAAGAGTGTGTGAGTTTGAATTAGAACCCCATGTGTGAG  
TCACAGCTTCTTAGCATGGACTAGTCATATACCTTCTGGACTCAGTGTCTCTCTGGGTTAAATGAAGATAAGGATCCCTGCCAATGACAGTGGAACT  
GCCAGGCTCAAACCCCTTATGGATTGGTATGCATTGTTAATCTGAGGTGAGCAATCACCTCACCCATTGTGCCAGGATAGGAGGAGATAGCTTATCA  
GAGCACAAGAGATCAGGCCACAGAAAGTCCGCTCTGCTGGCCCTCCACTCAGTGCATCATATGCTCTCAGGCAGCTGTGAGAGCCCTGCTCAT  
TGCACAGTAAAGTGTAGTACTAGTACCAAGAGAGGCCAAGGAAAAGGCCATCTCACCTGACACTATCAGCACCCACATGGGAGGTGCTTCTGT  
GTGGCATAAGTGCCTTCCAGCAACTTGTAGGCGAGAAAGCAAGGATGTCACCATAAGTCTGAGGCACCTTAAAGTCAAAGGCCCTACCAACTGTCTCT  
TAGTCACACAGGTAGCAGATGGACAGACAACGTAGGATGAAGAGCCACACAGAAAAGTGAAGAGTGGCCCTGAGAGCTAGCCCTGGAGAAGACCACAAAGTCTG  
CAGCCACTCAATGTGACAGTGTGTTGCTGAAGAGAGATGAAAAGTGAATGGCCCTGAGAGCTAGCCCTGGAGAAGACCACAAAGTCTGTCAGTGTGAGC  
CATAGTCAAAAAGAGGGAACCTAAAAGTGAAGGAGCATAAGAGGCCAGAAAAGTGTCTCCAGCAAGACAAGACTCGCCCTCTCCTGTCCAGACAGAGA  
GCAGCGCCACAGTCACTTCTCCTTTTCTGGCAATCTCCACTCAGAGCCCCACAAGGCAATGAAAAACAGATTCCACTCTAGCCCTGCTTGGAG  
AACTCCTGGTCTGGTCTCCTCCATCAACTGACAGCCCTGAAACATCTGACCTTCCAGTGCAGATACCCGTGTGTCTCCCTGTCTCGGAGACCTGGGG  
CCTAGAGGCCACAGTATACACAGTGTCTTTGAGATGACTTCTGTAGTCAATATCAGACTCTGTACAGTGTCTACCTTACTTGTAGTGTGGAGGAGGT  
GTTAGGTTGCTAGTCAACAAAGACAACTGTGTAGAGGCCAAGGAATGGGCTCCAGATCCTTTCTGTGTGTGTGTGTGTGTGTGTGTGTGTGTGTGTGT  
TAGACCTGCAGCACCAGCACCAGCCACCATCTGCATAATGGTTAGAAGCCTATAGTGAAGTGCACAGAAAAGTCCAGGTTTGTATTATGGCAGAGA  
CCACCACACCACAAAGACTCATCAACATCTATGTATGGACAAAAGTCCAGACATGCTATAGAGTAGCGGTGAAGTGGGAACATTGTATCTGTGC  
AAAGGCAGTGGAAATGGGTTAGAACACTTCTCAGTATCTATGAAAGTGCCTAGGCCATAACAAGTCTGTCTGGCTGGGGAAGAGCAGTAAGAT  
GACAAGTAACTCAGTATTTAGACACCCTAGGACAGTGGCGGGTACTAGTGTCTCCCAAGTGTAGATGCTACAGGATAACAACATAGCCACT  
CTGGGAAAAACACGAACCAATAGCACTGAAAGGATAGACAACCTCTAGACAGCTCTCAAGGAGCAGAAGTATCTCCACTGGCAGCCCTCCAGG  
ACAGCTTTCCCTCCAGGCAAGGTTAGAAGAGTGGCCTGCACACAGGCAGCCGAGAAGGAGGATTAAGTGTGCCATGGGGAACAAGGTCCATCTGCA  
CACTGTGTGACGCCAGCAGTGTACCCGACAAAGATAACAGATTGTGAGAGGAGTGCAGACATTTGTATCCTTCCAGCCATGGGTAAGGCTGTGTTGGAG  
TCAGAGCAATTTCTGAGGCTTTGGAAGGTCGACATAAAGAGTCAATGGCTGTTATTAGAAGTGCACACCAGCAAAACAATAAATGGAAGTGTCTCCA  
AATGTCTCGGCTCCACTCCTCAGTGGGGCCCTTTCCAACCCAGGAATGATACCCACAGGCTGTGTATCCAGGAAAAGAATGAAATTTCAACCTTAGTTT  
CTAGAAATGACCATTTGAAACAAAGTAGCATGAGGCAGGGGGCTGGGGTGGGAGGTAGCTTCTATGGCCAGAGGCTGCATTAACGTTTCAGGTTTCAGA  
CTTTCTCTGCTAGGCTGACACACACACACACACACACACACACACACACACACACACACACACACACACACACACACACACACACACACACACACAC  
TCACAGGGGCGACCTCTCTATAGATCCAGAAAACACAGTGCAGCCAGTGCACAGTTGCTATCCCTCTTGCTAATAAATAATCTGCTGATCTCCTAGCCA  
ACTAGACAAGATAGTCTGTTCTTAGACACAGCAGACAGTGTGACAGAATTTCCACAATATGATAACCTAACAGGCTGATGCTATACACACACAGTCA  
ACATGTCATCTGTTGGACATCACAAGGCCCTGCCTCTCCATGAAGAGCTACAGGCAGTCAAACAATGGATTCTGATCTGAGAAGCGGAGAATCCATTTT  
CTCTGAGCATAATCCCGTAATGGAATATTCAGTATCAAGTGAACAACCTAAGTACATATGAGCAACACTGAAACAGACTCTGTGGATCATATAGATT  
ATGTCTACAACGTATAATATAGAAGAGATCATGAATTTGGGAAAGTGGAGACAAGATGAATTTGGGAGATACAAGTAACTGATCTGTACTTGT  
AAGTCAACTCTCAAAAAATTTTTAAAGAGCATCTGCTGACTCCCTTACAATGTGACAGTGTCTCGGATCTGGGACCAATGTGAGTTCCATGCAAGG  
TCACACAGCAGCCCGTGGCAGCTGCAAGGCACCTCCATGTCAATTTCCCTGGTCTTACCAGATCTTGAGAACAGTGGCAAGGCAAGCAGCTCT  
GATCTTTGTTGCTTGTCTCTCTTTATCTGAAGGATGCAGTGGCATACTGTGATGCACACTAGATCTAAAGCATGCAGCCTGGTGTCTTCTGATATGC  
GTATACACTGTAAGACCATTACTGGTGGCCACTTGGTGTATTCTCCCGTCTCTCCAGGCCACTGTGATCAGCTTCTGTCTGTCTGCTGCTA  
GATTAGCATTTCTGAGTATTGATTCATGAAGTTATTCTATAATGTTCTTCTGCTTCCCTTTCAGCTCAGCTATTTCTTATATAGATGACAACACCGGA  
GGCTGTAGAGACTGCAAGGAGTGTGTAGACAATAGTCTGGCTCAGAGCCAGCATGCTGCTGCCACTATCCTTACCATCTACCTCATCTCCAT  
CCCCAGACATTAAGTGCAGCTTGGGGTGGGCTGAGTTTGTAAAACCTAGACATGGCCCTACCCTCAGGAACATGCAATTACTCTTTCTGTTTTTATTA  
ACCAACCTGTAAAGAATATTTACCAAATAACCCTCAGTGTGGGTGCAGTGTAAAATGATGCTGTTTCTCAAACCTCCACCCTCCTCCTACTGCTCC  
ACCTCAGACTGGACACTGGTACAGAGAGTATTCAAGATAAACCCCTGCTCTTCCAGGAACATGCAAAAAACACAAAGGAATGCCCTGTAGGCAATTGCCT  
GTACTTGACACTGAAAGAGTGTAGTACTGGGCTGAGCCCTGGATAGTGTCCCTCCACAGGAGAGTGAAGATGAGTGTGACACACAGGATTTTCA  
AGGGCACACAAAGGCAGATAAAGCTGGACTGGCCAGCATAGGTTCTGTGGCAGGTTATAGACCATCTCCACATGAGCAGGGGAAGATGACAAAGAGGC  
AACGTAACCTAGAAGTGGGACAGCTTAGTGGTGGGTCAGGCAGAGCAGATGGAAAGGGTATGGAAGTAAAGATTCCTGCATTTCTCATGACCCCA  
TTTTACTCCTTGAGTTTGTGTAATGATAGGAAGGGAGGTGAGGGAGGTTGAAGGGCAGTTACCCACATTTAAAGAAAAGATGACTTACAATTTAGAA  
AGTTACATCCCAGTAAATTCATAATCTCTCTCTCTCTCTCTCTCTCTCTCTCTCTCTCTCTCTCTCTCTCTCTCTCTCTCTCTCTCTCTCTCTCTCT  
TCTACCTTTTCTTTTGGGATTCAAGTTGTACACATGAGTTTCAAGGTGCACCTGTCTTATCCAGAGGGGAGAGAAGGACAGCTAGTGTCTGCTTCTC  
TGCTCTTCTTATTCCCTTGAGACAGGATCTCCACTGAACTTGGCACTCACTGCTTTTTCAGCTGGACTGGCTAGCCAGAAAAGTCTTAGCAAGCACACA  
AGCTTCTTACCTCAACACACACACACACATGGAAGGGATGGAGAGGGGGAGGGAGAGAGAAGTAAAATTAGATGAGATTGTGACACACAGGATTTTCA  
CATGGGTACCAGCATCCAAATGAATCTTTCATACCTGCATAGCAAACTCTTACCACATAAGGCTCCTCCAGCCCTCAGTATAGTCTTTTCAGT  
GGGAATTAATCTTCTTACCATTTTCATATACCAGAAAACCTGAGGTTTAAAAATCCAGTATTATTTCAAAAAATATTTCAACCCCTAAGTACGCAAAA  
CAAAGCTCAAAGCCAGGTCATTTTCCAGCCACACAGCTAACCTTTAGGGTCACTGTGTAGACCTAGGATTTGAGCTGCTGTCAACTGGTCTGTCTC  
AAAAATCTTACACACAGTTCTGACCTATGTTCCAACCACTTGTCTTGGCAAGCCTCATGAAGGTGCCACGTGAGTATATCTCCGAGTCTATATA  
GAAGGAGTGCCTCACTGAAATCTGGAAGGCAGCAAAGGCCACAGATGCCCAAGAGGCAGAGAAAAGTGTTCAGGATTTGACCTAACCCCTCATTCA  
CGTACATGGAATGGCAAGCAGAAAGCCAGGGCAAGCCCTCAAAGAGGTTGAGATCCCAAGATTCTATAAGCCTGGCTCCCCACCCCTCAGTCCCTGTGGT  
TAGTAGAGATGGTTCTGGGCAAGAGACTACAACAGAGCTCACAGAACTCTGCAGCACTAGCTATAGAGTTGTTGGAAGTCACTTGGCCATAACAATAC  
AATACAGTGTCTTCTAACTATTGCCAACCAGTGAATAAGGGAATGTGAAATCACTTTGAAGAGACTACAATGCTGTACACAGCAGGGCTCCCTGGC  
CCCTGTGATGTAATTTTCAATGCCATGGTCACTACAGATACCCTCAGGTTAGTCACTTACCTCTGCTCCACACTCACTAGCTGCCTGGCTA  
GTGTTCTTCAATAGAAACAGAAGCTGGCAGAACTGGAGAGTGTATCTATGTTTCAATATCCAAAGCTTTGGTCTTCCACTCCCAAGCTTCCCAAGTCCCA  
CCTACACACAGAGATGGTATAGGGAGAGAAGGAGGGAAAAGAAGGAGGGAAAGGAGGGAGGGAGGGAGGGAGGGAGGGAGGGAGGGAGGGAGGGAGGG  
GGAGGGAGGGAGGGAGGGAGAGAAGGAGGGAGGGATGGATGCTAGAGAGAGGGAGTTTCACTGAAAATTTACTCATTTGATTTAGAGCTCAAACTT  
CCACTGGCTAGTGTCTTAAATTTTCTGTGATGTGAAACACTGGCAAAACAGCAATAGATACAATCCTCTCTCTGCCAAGCATTTACACATGTAT

CACACTAACTCTACCCCTCAAAGATCTCCTTCCAGATAAAGGGGCTCCAGTCTTGAAGAAGACATTGTAGATCAGCCACCCTGCCTCTGTCTTTTTAGTCTT  
CCTGAACGCCATCCCAGACCTACAACCTTGACAGAACAGAGCAGAGCTTTGGCTGGGTGTCAAAGATGTAACAGAGAGGGTTTAAGAAAATGACTTG  
ACTGTTGGATGCAGAAAAGAGGAGTTAAGAGTGGCAATGGGTGTGGGAACATGCTGGATAAACTGACGGACATCACATGATTACAACATACTTTTCAT  
TATCAAGGAGCATTAACTTTCTCCTTTTGGAGACCCTTTAAGCCCCTGTGTTTCTAGGTCTTCTACTCTGGAGACAGTTTGCCCTCATCACTAGGA  
TCATTCCTCATACTTTATTTAACTAGTAGAGTGGTGTGTAACAACTCAGAGGAGCAAAAACAGTGCCAAGGAATGATTGCTGCTGGAACACCCACAGC  
ATTCCTCCCCAAGCTATTGCTAACTATTGCTTAATCCACTGCTATACCTTGCCTCAACAGTCAAGAGCCAGCTGAATCTACCTTGACTCCCATATAAT  
GAATTCCTTCTTCTCACAGCTCCAGTGGGTAGCAAAAGACTGGGGTCTTCATGCTGTTCTCTGACTCCCTAGAATGGATGTGTGAGTGGAAAAGA  
AATGGAGGTTGCTCTGGTCAATTTTGATAACTCGGATGAAATCCATGAAGAGCCAGGCTATGCCACAGACTTTGACCCAACCAGCTCAAAGGCCGCC  
CTGGTAGCAGTCCCTTTTCCAATGGAGAGTCCCTATCAGTGACAAACCAACCATGAAACTGCCTTCTCCAAGATCCCAGGAGAGTATGTGGATCCCC  
CGGGACCTGAGCCAGTGGTCTTGAATGAGGGAAAACCAAAGGGTGTATCAACATTTGCTGGTCTGAGATTCGAGACTCAGCTCAGAACACTTAATCAA  
TTCCAGAGACACTCCTGGGAGACCGGGAGAAAAGGATGCAATTTTTTGACTCCATGAGAAAATGATTTTCTTGTATAGAAAACAGACCTAGTTTGTAT  
GGAATCTTATATTATTACCAGTCTGGTGGGAAAATACGGCGGCCAGCCAACGTGCCTATCGATGTTTTCGCTGATGAGATCTCCTTCTATGAACTGGGT  
AGCGAGGCCATGGACCAGTCCGGGAGGATGAAGGCTTCATTAAGGACCCTGAGACACTGTGCCCCAATGACTTTCACCGGAATTTCTGGCTTCT  
CTTTGAGTACCCCGAGAGCTCCAGTGCAGCTCGAGGAGTGGCTGTGGTCTCGGTTTTGGTGTGATGCTCTCCATCACCATCTTCTGCCTGGAGACACTC  
CCAGATTTCCGAGAGGACAGGAGCTGAGAGTGGTCCAGAGCCAGCATCAATAACAAAACAGGCTCTCCAGACCATCCCAGGACTTACTGACTCTTT  
CTTCATGGTGGAGTCCACCTGCATCGTGTGGTCACTTTGAGCTGGTGTCCGGTTTTGGTGTGCCAGCAAGACTGACTTCTTCAAGAATCATG  
AATATTATTGACATCATCTCCATCATCCCCTACTTTGCAACCTCATAACAGAGCTAGTACAGGAGACCGAGCCAAGTCCCAGCAGAATGTCCCTG  
GCCATCTGAGGATATTCGTCTGGTGGGTTCCCGCATTTCAAGCTTTCTCGACACTTAAAGGGCTGCAGATCCTGGGGCAGACGCTGAAGGCT  
TCCATGCGGGAGCTGGGGTGTCTATCTTCTCTTCACTTCCCTTCTGAGTCACTTTCTCCAGTGCAGTCTACTTTGCTGAGTGGATGAGCCAGATCCC  
ATTTCTAGACTTCTGTGGGCTTCTGGTGGCTGTGGTCACTGACACTGATGCTAGCTACCGTACCGTACCGTACCGTACCGTACCGTACCGTACCGTACCGT  
TGGGTACTCTGTGCGCCATTGCTGGTGTCTCACCATCGCCCTCCTGTGCTGTCAATTGTCTCCAATTTCAACTACTTCTACCACCGTGAGACTGAGAA  
CGAGGAGAAGCCAAACATCCCAGGAAACTTGACAAAATCCTCAACAGCATGGGCTCCAGAATGGGGAGTACTGACTCTCTCAACAAGACCAATGGC  
AGTGTCTGCGAGAGAAGTCCAGGAAGTACCAGCCGAGGCTTCTAGAGTCTTGAACCCCTCCTCTCTACTGTTTCTCAAGTAAAGTAAATTA  
TGTTCTAAGCCAAAGAGGCCATCTGTGTGCTGTCTTAATAAAATCCTAGTGTCTGTCTTATTTCTGGGCTGTTTCTTCAACACATTAAGATTTCC  
CCTCCTTTCTATAAAAAGCATTAGCCAGCCCTTGCACTAGACCTATGGATGTTACCTGTTAGTATGAAAGTTCAGAGGCCAAGCCTGCCAGGCCTAG  
TGAATCAGAATCTACCTTTAAACATAAGAAAGATTAAGAAGTGCGGGGTTTTGCTCTTCTTTAAATGACATATATAAAAGACCAGAAGTGGGCTGAG  
GAGGTGGATAATAGACCTGCTTGCATGTAATGCAAGGACCTAAGTTTGAATGCGCAATACCTACATAGACTAGGCAAGGATGGCCTAGTGTATCC  
TGTTAAGAGAGACAAAACAGGAGACTCCAAAAGAACTGGCTAGTGTAGATGAGTACGCAAGTGAATGCAAGTTTCAAGTATAAGAGATTTGCCCTC  
AAAACATGAGATGAAGAGTGTGAAGAAGACACCTAACATCAGGCTTTACATCTAACTACAGACATGCACACCACATATGCAAGTAAAAAATAAC  
ATACAAAATAAAATTTAAGTAATATAAAAAGTACAGAGCTGTAGCAATGAATATAAATGACTTGTATTACTGACACCTGTTAGCGTTGCATAAGCTA  
AGTCCATTCAGTACGCTCGTATCAGCTGCCACTATAACCTGTAGAGCAGGCTTGATTATGTCTGTGTCAGCCTGTCTGGTAGAAAATGAGCATTT  
TCTAAAGTGTGAGCCCTCTTTTGGCTAGCAATAATTTCACTACCTAAGGTCACACAGAAACAAGGGAAGTCAATCTCTGCCTTTGAATCTGTT  
TCTTTGCTTAAATGAAGAGGGTTTTGAATCAATTTGTGAAAGAGTAAAAAGAGTTGAAATTTGGCTTTCAACCCACACTTGTCCCTAGATCTCCTCCA  
ATTCATAGATATTGTACATGCCATCCCCTCTGGTCCCCAGCCCTTTCTTAAACAGTGGGCATGAAAAACACTCTTTAATGCTTTTATCTGGCCACA  
TCCAGGGAGCAGCTCAGACACTGGAGATCTAAAAATGGGTGAGAAATGTACCAGAGGACAGCTCTAGGATCATAGACCTGTCTGCCTGTCTGGGGT  
TCATCTCCATAGGATAACCCAGGAATGGCCAAGAGCCTGAGGAGCAGTGGAGCAGAAAAAGCAGGCATGTGTCCAGAGGTCAGGCTTACCCAGG  
ATGACAGCTGTGTGAGCTGACTGAAATGAAACATGGCTTTCTTAAGAGAAAGAGTGTGACTTGAACCTTGAACCAAGCTCCAGGATCCAGGATAAGAGAA  
TCAGAATCTGAAAGGATAGGAAAGGAAGCCTTACTCTGCCCTCTCAACCCACCTCCTCAAGTAAACAAGCTTGTGCCTCCCTCTGTCCCAATACCC  
AAATCTAACCTCATAACAAGGTAACCTCAGTGCAAGGCAATGCCCCCTGGGCCCTAAGTCACTGCTCAGCCCATCGTGAAGGTAAGCTGAAAC  
CAAGAGAATCTGGTAGCATAGTTCCAGTGTGGAGTGGCAATTTCAAAAACCAAGTAGAGTCTCAAATGCTTCTTTGTGCATTTGATGAGTACAGTGAGC  
ACTGGAACCCCAACTGGACCAAGTGCAGAGATAAGTTTGGTGGAGTGTAAACATGAGATAGATACATGAGATACATGAGTACATCCCACTTCCAGAGGCTCA  
GGGGACATCTCCAAGGAGGGGTGGTAATACTGCAAGACGAGGAAGACCAAGGCAAAAACAGTCTCCTCAACATGACAGGACCGCCACACTTGTGAGCC  
CACAGCAGCTGTGCTTGGCTACCCAGGCTGTCTTCAACCTTTAGTATAGAGTGACAAGAATCTATGATCCCTACTCTACCTGATGAGCTATGGAC  
AGATGGTGGTGTAGAAAAGGGAGTACAGTCTTTCTTTAGGGGTGTGGTCCCTGTGTAATTTGACTGTGCTCCAGTGCCTGGCCACACACCTATATAT  
GGCCTCCCAAACTCAGTGGGATAGATGACAGATAGATAGATAGATAGATAGATAGATAGATAGATAGATAGATAGATAGATAGATAGATAGATAGAT  
AGATAGATAGATAGATAGATAGATAGATAGATAGATAGATAGATAGATAGATAGATAGATAGATAGATAGATAGATAGATAGATAGATAGATAGAT  
TATGAATGCTTTCTTTGGAAATAATTGACAGTTACAGAAAGAACTGCCTTTATAGTCCCAGTCAATCAGCCCTCAGCACAAGTAAACTGAGTCT  
AGGGACAGCATAAAAAGTTGATCAATGAGCTGGGGAATCTGTGAGCAATAGAGTGTCTTAAAGCACAAGAAATGAGTCCAATACCCAGGACCCA  
TGTTTTTAAAGTCCAGGTGGTGGCACACACTGTAACACTCAGTGTGAGAGGCAAGGCAAGCTGATCCCTGGGCTCTCTGTCCAGCAGCTCA  
GCCTACTTGGCATGTCCAGGACGTGACAGACCCCTAACCTAAAAAAGAAAGAAAAAAGGAGACAATATAGGAATGACATCAGACATTATCTTC  
TGGCTCCACAGGTAAAAAGAACACATATGCACAAAAGCACACACATACATAAGATAATCAAACCTACTGATGTAGGATGCAGAGTGTAGCCAGA  
GTTTTGGATACTATACAATTAATAACCAACTGTTGTGTTTTAGCTGCTATGATGAGGTTTATCTCAAATTAATTAATAAAGCAGATATTATTT  
CCATTTAAGTGGTGAAGAAATCGAATCTTCAAGAAGTTTAGTAATTTTTCTGTGACAGAGCCCTCAGTGAAGGGAACACCAAAATGGCAGATGTG  
ACAATAGCAATTAATCTCTCCTCACTTCTGGGTCAGAACTAATACCTGTGTGTTGTAAGGCTTCCCTCCAGCTCAATGCTTCCCTCCAGCAAACTAAAGTGT  
GTACCATAGTCTGCATAGCTCGTTCCTGAGGTTCTGGGACATTGGACAGGCTGGTTAGAGTCACTCTGTGTGCCAGTCCCTCCTGGTCCACCTTTG  
TATCTTTGGTCTGGGAAGGGGGATTTACAAGACTGCATCAACAACCTGGGCACAGACTGTGCTCTCACAGGTTCTCAGAAGCTGGCCTGTG  
GGTACTCTGCCTCTCAAGTCTCAAATAGGAGTGCACAAGCTGGTGCAGGAGTAAGTTAGCGGATGCTTTCAGTCAAGTGCAGAGAACTCAGC  
CCAGCTGAATCCATTTGTTTCAGATTGTACGGTCCCAAGACTGAACTGCAACTGCAAGTGAAGGAAAGGCAAGAAATGGGGTGGTGGCATCTGGGGTCTTAAA  
CTCCACTTTAGAGCTCTTGATTTCTCCTCCTATGTTCTGCTGGATGGCTTCTCATGCCAGAGTGAACAATCTCTGTAGGACAGGGAGACAGGGAGAC  
TAGCAGCCCTCAGTTCACAGCTTTATCCTTACTTAAAGCAGAGAGAGAGAGAGAGAGAGAGAGAGAGAGAGAGAGAGAGAGAGAGAGAGAGAGAGAGAG  
TAAATAATGTCTTTATGAGCTGATTTCTCGTTTAAATGTTAATGTTTAAAGGTGGGTTTTTTTTTGTATCCAGTTATATTCAAAGTGAAGTGTATTAGT  
ATATGGTATAGATTTAATACTGTGTGATTAATTAATTAATTTTCACTTTTAAAGTCTTTTCAATTAACCTTAAAGAAAACAACTGAATGAGTGTAGTCT  
GAGAGTCAAGCCAGACGGTGAACCTTCACTTCACTTCACTTCACTTCACTTCACTTCACTTCACTTCACTTCACTTCACTTCACTTCACTTCACTTCACTT  
GTCCAGGCGTCAATTGTACCAAGCTAGACTGGAAGTAAAGAAGCTTCGCCCCCTGGATGTGTGACACCACACATCCCTGCAGTGTGTGAGGGGAGA  
AACAGCCTCCAGGTTTTAGTGAACATCTCTGTTATTGGGGTGAATAAGGGTCTCTAAACCTTGGGAGTGGGGAGAGATTTGGGGTAAAGTATAC  
ATCATTTGGCTGGGCTGAGATGCTGGGAACACTTCATTGCTTGGAGAGATTTCCAGGTGCTTGTGGACACGTCCTTATATAGGAAAGAGGAAGTAA  
ACTTGTACTTTGGGACTACCTCAAGGGTGGTAGAGTGTGTTATAGGCTGAACTGCAAGTGAAGGAAAGGCAAGATAGGCCAGAGCAAGAAGGAAACAGCTC  
TATTCCTGCCAGTCTAGGGATAACGTTTTTCAGGGTTTCACTCAACCTCACTCATGCTCCAACTGGCTTCTTATCTCATGACTTTCTGGGCTCACT  
GCCTCAAAAATAACAAGGTGGAGAGCAACAGAGGAGACACTCAGCATCTGCTCTGCTCTGGCCTGTCATGTGTGTGATGCGAGCGCTGCACACTCA  
CGTGTATGTGCCACATGTACCCGAAATACATCAAAACAGGGCACAATTTTGAATAATCAAAATGCAGGAGATGATCAATGCAAGGTGGTGTATT  
TGTGTGGCTTTGACTACTTTTTATGTTATGTTATGTTATGTTATGTTATGTTATGTTATGTTATGTTATGTTATGTTATGTTATGTTATGTTATGTTATGTT  
GTTATGTGCTGGCTGGTTTTTGTCTATCTTGACACAAGCTTAGGTGTAGCTGGGGAGAAGAGCTCTTAGTCCAGAAAATGCCTCCATCGAATTTGGCCTGT  
AGGCAAACTGCGAGGGCATGTTCTGACTGATGATTAATATGAGAGAGACCCAGCCCTCCTGGACAGTTAAGAAAAGCAGGCTGAGTAAAGTACAGGGGA  
GCAAGTCAAGTACAGCGCTTCTCCATGACTTCTGCTTCAAGTCCCTGCCTCAAGTCCCTGCCTTGGCTTCTTCTGATGGTGGATTAT

AATCTGTAACAAGCCAAATAAACCCCTCCTCCCTAAGTTGCTTTTGGTCTTGGTGGCTATCACAGTAACAGAAACCTAAGACAGGCCACCCAGAGAA  
GCACAGAGAGAGGAGGCTGCCCTCCTCCTCCTCCTGCTGGGGTCCCTAACCTGACTGCAGAGGGTTGGTGTCTGGGTTGGAGACTATAACAGTAAG  
TAAGTAAACTCTCCCGAGAGTTGCCAGCTGCCTGCTGATGCTGAAGTAGTTTTTTTCAACTGAGGCAGGAGATGTGTCCAAAGAAAGCTCAAGTT  
GTGTTATGTGCCCTTTGTGTATAGAGCGACTTACTGTGCATGGAGTCTACAGCTCTGTAAATAGTGGGAAGGAACTTCTATAAGAGAAGGATCCCACAG  
GACTCAGTCAAGACTCAGAAAGACAAAGAGGGGAAACCCAAAAGGCAGCTGAAGGCCTCTGAGGACCCAGCCACATCCTTCGAGGGCTTTTCTT  
CAAGGACTTCCCTCAAGAGGCTCAGGACTAACAACTGGTGGTCTCTCCTTCAACCTAGCTTCTGCATTGTCTACCCGGCTGGAGCAGCCTCTGC  
CCATCTCAGTGGGCTCAGAAGAAACAAAGCAGCCCTCCCACGGGAACAGGGTCCACCTAGGCCAGATGCCAGGGTCTCACCTCCTCCCTATGTA  
AGGAAACTCACAAGGTGCCCTTCCCTGCTCAGCAGTTGATTGGAGCCTACTGAAAGATGAAACATGCCCCATCCACCAGGCTGAGTGGAGTGTCAA  
GGCTCTTTGAAGGGAAAGAAAGAAAGACAGCCAGTCTCCCTGGGGACTGCTGTCAGGAGAACATTTGCCCTCAAACAGGGAGATGAAAAGGAGCTG  
GGGGTTGGCAAAGAGGGAGGAGGAAGATCAGACAAACTTTTGTATGGAATCTCAGGGGAGGCGGAGGTAAGGGCTTCTTGGAAATGTCACGAGAT  
AATGAATGCTATTTTACTCCCATTTGCTGAAGTGTACGTAGAGGCTTGGGGAGAGAAGGCGTGACTCTCTCCTTAGGAAGGAAATCTGGGTGATCTTGT  
ATGTCTCAGAACCAGAGGGGTGATGGCTGAGCCCTCTGCAGTCTGCAGGGCTCCCGCATGCGCAAAAATATAAATATAACAATACAGAAGTAACAAAA  
ACACCACACTAGTAAGATTATCGTGAGATTTAAACAGGGTGTCTGTGAAACTCAGCAAGCTATACAGGTTCCCATGCAAACAGGAGTGTGCAAAACA  
GTGACTTGACACTTAAATGACAGATAAATAGTGTGGGATGGTGGTAGAGCCTAGGATAAAAAGCCACCTGTCACTTATAAACTGCACGGGTGAC  
AGCTGCAATCTTTGAGTGAATGACACCCAGGACTGTCTGGGTACATAAAGTGTACAAAAAGGAAGGACTGAGACATAAAAGGACCAAGTGTGAGA  
GCCCCAAAGAATCCCATGCTTCCCAAATTGACACCGAATTGACATTAATTTAGTCCACCTGAAAAAATGTTTTCTTGGGTGGTAGTGGTGGTGG  
TAGTGATGATATGTGTTTATGTGCTGTGCTGTGCAAAATGTATGTGCAAAATGACATGTATGTGAGTGTGTGTGTGTGTGTGTGTGTGTGTGTGT  
TGTGTGTGTGTGTGTGTGTGTAGGTCATAAAACAACCTCAAATGTCAATTTCTCAGGTGCTAACGTTTTTATTTTCAGACAGCCTCTCTGTGACCTGAAAC  
TCCTTGCCAAGTAGGCTAACCTGGCCAGCAATGAGGCCCTAGGACCTACTGCTTCTCCCTGTCAGTCTGAACATAGCATGCCTGACTTTTTTGTGTTTA  
TTCTATTTTTTCTCAATTTGATTTCTGTGGAATCAATCTTGTGCTTATGAAAATCCCATTAACCTGAGGTAACCTTTCAGGTAACCTTTCAGGTTGTTGT  
TGTGTTGTTGTTGTTGTTGTTGCTTTCTTAAGACCCAGTCTCTGGGTCTTATACAGATAGCCAGACTATAAACAAGGAGGACCTTGAACCTTCTGATCT  
CCCTGCCCCATCTCCATAATGTGAGATCAGGCAATCCACCATAACTGCCAGTGTATGACAGGGCTGGAGATCCAAACCCAGAACCTCCCTACATTTTA  
GGCAAGCTTCAACACTAACTACATCTTAGGCCAAACCCAGAAAGCTGATTTAAGTAGCTTATTGGCCCTGAATTTTGTGTGCAGACCTGAATTTA  
CTCCATTTTTTTCTCAAACTAAGCCAAAAATAACTGATTTGACACAGGGTGCACCAAGTACAGTCTGGTTAGGTTAGATAGACAAAGTGTGTTT  
CCTCAAGTAACCCCTCGGGTCTCTGCTATGACCAGATGCTCAGTCTGTCTCCGGGTTACAGAGACAGCCAAAGGAGGAGCAGCTCTGCCCTATGAGGT  
ACAGAAGATCCAGGAACCTCACCCCTCCTGTAAGTAAGAGGCTTTCTTATAGTTTACCTTTCTAATTTCTGATCTCTCCCTGTGAGGTCACAGGAA  
GCCAGCTCCCCACCCACCCGCACTCCCTACCCATCAAGTGGCAACACTGACCTTTTGTGAATCAACCTAGATGTGGGAGTGAACCTGAACAAGT  
TCAGTCTTCTCACTGAATGACACGGCCACAACCACTCGAAAACACTCTGACCTGGGAGGGAGCTAATGTTGAGGACTAATGTTGACAGAAATGCGGT  
AGTTCAGATGCAGCAAGAAAGCAGAAAGGATGGTCTGGATGTCCCGAGAACAGAAGCCAAACAGACTTGACCTTGCATTGTTTCCAGAGAGAGACA  
GAGACAGACAGAGAGAGAGAAGAGGAGAGAGACAAGGACGAGGGGCAATAGGGAACAAACTAGGAAGAAGTTTCTTCTTAGGCCACTCAAAGCA  
CGTGAAGAGAGAACAGAGGATCCATTTCTTCTAGGTTTAAAGAACTAGAAAGAGCAAAGTGTGAGCAACCTTTTTCTCAGAGTTGGGTGGAGATGTGGAG  
CTAAAGAAAGGAGCAAGGAAAGTAAATGGCTTTAAAGAGGAATCTCCCTGGGCTCGGCTTCCCGTTTGCTAACAGTTACAATAAACACAAGCT  
CCTGAGACTCAGTGTGAGATAAAACAGTATACCTGATAGTCTTGTGCTTGTACACCTGGAACACTGGAACAGACACTTCCAAAGCAGAATGGAGGTCAATGAAGATGT  
GACTGTCCCGTGGCAGATTTAAGGAGATCAGACTGTGAGGTGGAGGGTGCCTAGGACAAAACCTACTGCAGTTTGTAGTTTCAAGGTCACCTTGCCTGCGT  
CCTTAAATATCATCACTCAATAATTATAGTATAGTATAGTGCAATTCTATATTAGCCAAGTGTGTAGTAGATAGTCAACATATCTTTATAAAATGCAAG  
AAGTGAAGAAAGGAAAGAAATTTGGTCAAAAATAAGAAATGTTTCTTAAAGTCAACAGTTTCACTCAATGTCCACCAACTTAAAGCAACTTG  
ATATCTCCAAACATTAACCTGGATCCCTGGTGGCTGCTCTGTGCTTGTGACACCTCAACATTTGTGGGTTTGGAGGACTTCCAAAGTCAACAGACTAGC  
AGGGCCAGTTCTCTTTAGCTGTTACTAGAGGTCAGAGTACAGCCTCTGCCACAGAGACTTACCACACCAGTCTCACAAACACAGTTCTTGCATTCCC  
AGAGTGAGCAAGAAATGACCGAAGAGAAATCTCAGGCTCTTTCAGGCCAACTTCAAGATCGGTGCCTTGTGAGCCACCTCTTCTATTTGCTGCCAGCT  
CTTGTAGGATGTCACTCAAGCAACATCTCTTCTAGGATGCAGGACTTGACAGAAAAAAT

**Selection Cassette:**

GGCCATAGCGGCCATTTAAATGGCGCGCCGATCCGAATTCCTCAGGGCTAGAACTAGCGATAAGCTTCGAG:G::ATCAATTCGCCCTCTCCTCC  
CCCCCTAACGTTACTGGCCGAAGCCGCTTGAATAAGGCCGGTGTGCGTTTGTCTATATGTTATTTCCACCATATTGCCGTCTTTTGGCAATGTGAG  
GGCCCGAAACCTGGCCCTGTCTTTGACGAGACTTCTAGGGGCTTTCCCTCTCGCCAAAGGAATGCAAGGTCTGTTGAATGCTGTGAGGAAAGC  
AGTTCCTCTGGAAGCTTCTTGAAGACAAACAACGCTGTGAGCGACCTTTGACAGGCAAGCCGAAACCCCACTGGCGCAGGTTGCTCTGCGGCCAA  
AGCCACGTGTATAAGATACACCTGCAAAGGCGGCACAACCCAGTGCCACGTTGTGAGTTGGATAGTTGTGGAAGAGTCAAATGGCTCTCCTCAAGC  
GTATTCAAACAAGGGGCTGAAGGATGCCAGAAAGGTACCCCATTTGATGGGATCTGATCTGGGCTCCTGGTGCACATGCTTACGTGTGTTAGTCGAGG  
TTAAAAAACGTTAGGCCCCGCAACCCAGCGGACGTTGTTTCTTTGAAAAACAGATAAATCCATGGCGGATCCCGTCTTTTACAACGCTGTGAC  
TGGGAAAACCTGGCGTTACCCAACTTAATCGCTTGCAGCAGCATCCCTTTCGCGGATGAGCTGGGCTAATAGCGAAGAGGCCGACCTTCAAGCTG  
CAACAGTTGCGCAGCTGAATGGCGAATGGCGCTTTGCTGTTTCCGGCACAGAAAGCGGTGCCGAAAGCTGGCTGGAGTGCATCTTCTGAGGC  
CGATACTGTGCTGCTCCCTCAAACCTGGCAGATGCAGGTTACGATGCGCCATCTACACCAACGTAACCTATCCCATACGGTCAATCCGCCGTTTGT  
TCCACCGGAGAATCCGACGGGTTGTTACTCGCTCACATTTAATGTTGATGAAAGCTGGCTACAGGAAGGCCAGACGCGAATTTTTGATGGCGTTAA  
CTCGGCTTTCACTGTGGTGAACCGGCGCTGGTTCGGTACCGGACAGGACAGTCTTTGCCATGAAATTTGACTGAGCGCATTTTACGCGCCGG  
AGAAAACCGCTCGCGGTGATGGTGTGCTGCTTGGAGTGACGGCAGTTATCTGGAAGATCAGGATATGTGGCGGATGAGCGGCATTTTCCGTGACGTCT  
CGTTGCTGCATAAACGACTACACAAATCAGCGATTTCCATGTTGCCACTCGCTTAAATGATGATTTACAGCCGCGCTGACTGGAGGCTGAAGTTCAGA  
TGTGCGGCGAGTGTGCTGACTACCTACGGGTAACAGTTCTTTATGACAGGGTGAACCCGAGGCTGCCAGCGGCCACCGCCCTTTCGGCGGTGAAAT  
ATCGATGCAGGTGGTGTATGCGGATCGGTCACACTACGTCAGCTGAAACGCAAACTGTGGAGCGCCGAAATCCCAATCTCTATCGTGTG  
GGTGGTTGAACTGCACACCGCCGACGGCAGCGCTGATTGAAGCAGAAAGCCTGCGATGTGCGTTTCCGCGAGGTGCGGATTTGAAAATGGTCTGCTGCTG  
TGAACGGCAAGCCGTTGTGATTTCGAGGCTTAAACGTCACGAGCATATCCTCTGCATGGTCAAGTCAATGATCGTCTGACCGTACCGCGCTGGCTACCGGCGATGAGCGCAACGCGTAACGGG  
AATGGTGCAGCGCATGTAATACCCGAGTGTGATCATCTGGTCTGGGGAATGAATCAGGCCAGCGCTAATCAGCGCAGTCAACGAGCGGCTGATACGCTGCT  
TCAAATCTGTGATCTTCCCGCCCGGTGCAGTATGAAGGCGGGGAGCCGACACCACGGCCACCGATATTATTTGCCGATGTACGCGCGCGTGGAT  
GAAGACCAGCCCTCCCGGCTGTGCCGAAATGGTCCATCAAAAAATGGCTTTCGCTACCTGGAGAGACGCGCCGCTGATCTTTGCGAATACGCCCA  
CGCGATGGGTAACAGCTTTGGCGTTTCGCTAAATCTGGCAGGCTTTTCGTCAGTATCCCGTTTACAGGGCGGCTTCGTTGGGACTGGGTGGATCA  
GTGCTGATTAATAATGATGAAAACCGCAACCCGTTGCTGGTACCGGACAGGACAGTCTTTGCCATGAAATTTGGGATACGCCGAACGATCCGAGTCTGATGAAACGCT  
GGTCTTTGCCGACCGCACGCGCATCCAGCGCTGACGGAAGCAAAAACACCAGCAGCAGTTTTTCCAGTTCCGTTTATCCGGGCAAAACCATCGAAGTGA  
CCAGCGAATACCTGTTCCGTCATAGCGATAACGAGCTCCTGCACCTGGATGGTGGCGCTGGATGGTAAGCCGCTGGCAAGCGGTGAAGTGCCTCTGGAT  
GTCGCTCCACAAGTAAACAGTTGATGAACTGCTGAACTACCGCAGCGGAGCTGAGCTGAGCGGAACTCTGGTCAACAGTACGCTGCAAGTGAACCGGAA  
CGCAGCAGTGGTTCAGAACCGGGCACTACGCGCTGGCAGTGGCTGAGCGGAAACCTCAGTGTGACGCTCCCGCCGCTGCTCCACCGCA  
TCCCGCATCTGACCACAGCGAAATGGATTTTTGTCATGAGCTGGGTAATAAGCGTTGGCAATTTAACCGCCAGTCAAGGCTTTCTTTCACAGATGTGGA  
TTGGCGATAAAAAACAACCTGCTGACGCGCTGCGGATCAGTTCACCCGTGACCGCTGGATAACGACATTGGCGTAAGTGAAGCGACCCGATTGAC

CCTAACGCCTGGGTGCAACGCTGGAAGGCGGGGCCATTACCAGGCCGAAGCAGCGTTGTTGCACTGCACGGCAGATACACTTGCTGATGCGGTGCT  
GATTACGACCGCTCACGCTGGCAGCATCAGGGGAAAACCTTATTTATCAGCCGAAAACCTACCGGATTGATGGTAGTGGTCAAATGGCGATTACCG  
TTGATGTTGAAGTGGCGAGCGATACACCGCATCCGGCGCGGATTGGCCTGAACTGCCAGCTGGCGCAGGTAGCAGAGCGGGTAAACTGGCTCGGATTA  
GGGCCGCAAGAAAATATCCCGACCGCTTACTGCCGCTGTTTTGACCCTGGGATCTGCCATTGTCAGACATGTATACCCCGTACGTCTCCCGAGC  
GAAAACGGTCTGCGCTGCGGGACGCGCAATGAATATGGCCACACCAGTGGCGGGCGACTTCCAGTTCAACATCAGCCGCTACAGTCAACAGCA  
ACTGATGGAAAACAGCCATCGCCATCTGCTGCACGCGGAAGAAGGCATGGCTGAATATCGACGGTTTCCATATGGGGATTTGGTGGCGACGACTCT  
GGAGCCCGTCACTGTCAGTATCCAGTCCAGCTGAGCGCGGCTGCTACCATTACCAATGGTCTGGTGTCAAGGGATCCCGGGCTGCAGCCAATATG  
GGATCGGCCATTGAACAAGATGGATTGCACGACAGGTTCTCCGGCCGCTTGGGTGGAGAGGCTATTCCGGCTATGACTGGGCACAACAGACAATCGGCTG  
CTCTGATGCGCCGCTGTTCCGGCTGTCAGCGCAGGGGCGCCCGTTCTTTTTGTCAAGACCGACCTGTCGGGTGCCTGAATGAAGTGCAGGACGAGGC  
AGCGCGGTATCGTGGCTGGCCACGACGGCGTTCTTGGCGAGCTGTGCTGCAGCTTGTACTGAAGCGGAAGGGACTGGCTGCTATTGGCGAAG  
TGCCGGGCGAGGATCTCCTGTCACTCACCTTGTCTCCGAGAAAAGTATCCATCATGGCTGATGCAATGCGGGCGGTCACACGCTTGCAGCCAATG  
CCTGCCCATTCGACCACCAAGCGAAAACATCGCATCGAGCGAGCAGTACTCGGATGGAAGCCGGTCTTGTGATCAGGATGATCTGGACGAAGAGCAT  
CAGGGGCTCGCGCCAGCCGAAGTTCGCCAGGCTCAAGGCGGCATGCCCGACGGCGAGGATCTCGTCGTGACCCATGGCGATGCCTGTTGCCGAA  
TATCATGGTGGAAAATGGCCGCTTTTCTGGATTATCGACTGTGGCCGGTGGTGTGGCGGACCGCTATCAGGACATAGCGTTGGTACCCTGTGAT  
TGCTGAAGAGTGTGGCGGAATTCCTATCTCAGCTGACCGCTTCCCTGTCTTACGGTATCGCTCCCGTACCCAGTTCGAGCATAGCCCTTACTGCGCT  
GAGTTCTTGAGGGGATCAATTCTAGAGCTCGTGTACGCCTGACTGTGCCCTTAGTTGCCAGCCATCTGTTGTTGCCCTCCCCGTCCTT  
CCTTGACCTGGAAGTGGCACTCCACTGTCCTTCTAATAAAAATGAGGAAATGTCATCGCATTTGTCAGTAGGTGTCATTCTATTCTGGGGGTG  
GGTGGGGCAGGACAGCAAGGGGGAGGATTGGGAAGACAATAGCAGGCATGCTGGGGATGCGGTGGGCTCTATGGCTTCTGAGACGGAAGAACCA  
GCTGGGGCTCGATCTAGAGCTGAGTACCGGGTAGGGAGGCGCTTTTCCAAAGGCAGTGGAGCATGCGCTTATAGCAGCCCGCTGGGCACTT  
GCGTACACAAGTGGCTTGGCTCGCACACATTCACACCCGTTAGCCGCAACCGGCTCCGTTCTTTGGTGCCCTTCTGGCCGACACTTCTAC  
TCCTCCCTAGTACAGAAAGTTCCTCCCGCCCGCAGCTCGCGCTGTCAGGACGTGACAAAATGGAAGTAGCAGCTCTACTAGTCTCGTGCAGATGG  
ACAGCACCCTGAGCAATGGAAGCGGGTAGGCTTTGGGGCAGCGGCAATAGCAGCTTGGCTCCTTCGCTTCTGGGCTCAGAGGCTGGGAAGGGG  
TGGTCCGGGGGGCTCAGGGGCGGGCTAGGGGCGGGGCGGGCGCCGAAGTCTCCGGAAGCCCGGCAATTCGACGCTTCAAAGCGCACG  
TCTGCCCTGTTCTCCTCTATCTCCGGGCTTTCGACTTCCAGTGGCCGCGGCTTACCATGACCGAGTACAAGGCCAAGGCTGGCTCGCC  
CCCGCGACGACTCCCGAGGCGTACGCACCCTCGCCGCGGCTTCCGGACTACCCCGCCACGCGCCACACCGTGCATCCAGACCGCCACATCGAG  
CGGGTACCGAGCTGCAAGAACTTCTCCTACGCGCGTGGGCTCGACATCGGCAAGGTGTGGTTCGCGGACGACGCGCGAGCAGTGGCGGTCTGGAC  
CAGCGCGGAGAGCGTCAAGCGGGGGCGGTGTTCCCGGAGATCGGCGGCAATGGCCGAGTTGAGCGGTTCCCGGCTGGCCGCGCAGCAACAGATG  
GAAGCCCTCTGGCGGCAACCGGCAAGGAGCGCGGCTGGTGGTGGCCACCGTTCGCGGCTTCGCGCCGACCAGGCCAAGGCTGGGCTCGCC  
CGTCTGCTCCCGGAGTGGAGGGGGGAGCGCGCGGGGTGCCCGCTTCTGGAGACCTCCGCGCCCGCAACCTCCCTTCTACGAGCGGCTCG  
GCTTACCGTACCGCCGACGTCGAGGTGCCGAAGGACCGCGCACTTGGTGCATGACCCGCAAGCCCGTGCCTGACGCCCAGCCACGACCCGCGAG  
CGCCGACCGAAAGGAGCGCACGACCCATGCATCGATGATCTAGAGCTCGTGTATCAGCCTCGACTGTGCCTTCTAGTTGCCAGCCATCTGTTGTTG  
CCCTCCCGGCTGCTTCCCTGAGCTTGAAGTGGCACTCCACTGTCCTTCTAATAAAAATGAGGAAATGTCATCGCATTTGTCAGTAGGTGTCAT  
TCTATTCTGGGGGTGGGTTGGGCGAGGACGAAAGGGGAGGATTGGGAAGACAATAGAGGCAATGCTGGGATGCGGTGGGCTCTATGGCTTCTG  
AGGGGAAAGAACAGCTGATTACCTGTTATCCCTACTCGACCTCGAGGGCGGCCATTTAATGGCCAGCGAGG

**Targeted Locus:**

CAGCCGAGAAGGAGGATTAAGTGTGCCATGGGGAACAAGGTCCATCTGCACACTGGTGCAGCCAGCACTGTACCGGACAAGAATACAGATTGTGAGA  
GGAGTCAGACATTGTGATCCCTCAGCCATGGGTAAAAGCTCTGCTTGGAGTCAGAGCAATTCTTCGAGGCTTTGGAAGGTCGACACATAAGAGTCA  
TGGCTGTTATTAGAAGTACACACAGCAACATAACAATGGAAGTGTCTCCAAATGTCTCCGGCTCCATCCTCACTGGGGGCCCTTTCCAACCCAGAGA  
ATGATACACAGGCTGTGTATCCAGGGAAGAAGTAAATTCACCTTAGTTCTAGAAATGACCATTGAAACAAAAGTAGCATGAGGCGGGGGCTGG  
GGTGGAGTACTGTTCTATGGCCAGGCTGATTAACGTTTCAGGTTTCAGACTTTTCTCTGTAGAGGTTGACACACACACACACACACACACAC  
ACAAAAACAAAAACAAAAACAAAAACAAAAACAAAAACAAAAACTGGTCTCACAGGGGCGACCCCTCCTCTATAGATCCAGAAACCACAGTGA  
CCAGTACAGGTTGCAATCCCTCTGCTAATAAATATCTGCTGATCCTAGCCAAGTACGAAAGATAGTCTGTCTTCTAGACACGACAGAGTTGACAGA  
ATTTCCACAATATGATAACCTAAACAAGAGCTGCATGTATACCACACAGTCAACATGTCATCGTGGGACATCACAAGGCCCTGCTCTCCATGAAGA  
GCTACAGGAGTCAACAATGGATTCTGATCTGAGAAGCGGAGATCCATTTTCTGTAGCATAATCCCGTAATGGAATATTCAGTATCAAGTGAAC  
AACCTAAGTACATATGAGCAACACTGAACAGACTCTGTGGATCATATAGATTATGTCTACAACGTATAAATGAATATAGAAGAGATCATGAACTTGG  
AAAGTGGAGACACAAGATGAATGGGAGATACAAGTAACGTATCTGTACTTGTAAAGTGAACCTTCTCAAAAAAATTAATTTAAAGAGCATCTGCTGAT  
CCCTFACAATGTGAGCTGTCTCGGATCTGGGACCATGTGAGTCCATGCAAGGTACACACAGCCGCTGGCAGCCTGCAAAAGACCCCTCCATGTC  
ATTTCCCTTGGTCTTACCAGACTTTCGAGAACAGTGGGAAGCAAGCACTGTACTTGTGTTGTTGCTCTCTTTTATCTTGAAGGATGCAAGTGGC  
ATACTGTGATGCACACTAGATCTAAAGCATGCAGCCTGGTGTCTTCTGATATGCGTATACACCTGTAAGACCTTACTGGTGGCCACTTGGTATTGCTC  
CCGTCTTCTGCCCCTCTCTCCAGGCCACTGCTGATCAGCTTTCTGCTGCTCTAGATTAGCATTCTGAGGTTTTGTATTATGAAATTTCTATATGTT  
CCTATCTGGCTCCTTGTACTAGCCTATTTCTTATATAGATGACAAACAGGAGGCTTGTAGAGACTGCAAGCAGTTAGTGTAGACAATAGTCTCTG  
GCTCAGAGCCGAGTGTGCTGCCACTCATCTTACCCTCCATCTTCCAGACATTAAGTGCAGCTTGGGGTGGGCTGAGTTTGTAAAA  
CTAGACATGGCCCTACCTCAGGAACATGCAAAACATGCAAAATCTTCCGTTTAAACAACTTGTAAAGAATTTTAAACAAACACACACACATGTTGGG  
TGCATGCTTAAAAATGATGCTGTTTCTCAAACCTCCACCCCTCCTCTACCTGCCACCTCAGACTGGACACTGGTACAGAGAGTGATTCAAGATAAACC  
CTGCTTTCAGGAACATGCAAAAAACACAAGGAATGCCCTGTAGGCATTGCTGTACTTGGACACTTGAAGAGGTTGTAGGTTAGGCTGAGCC  
CGTGGATAGTGTCCCTCCACAGGAGAGCTGAAGAGATGTCAGTGCAGCAGGGCAGGGCACAAAAGGCAGATAAAGCTGGACTGGCCAGCATAGGT  
TCTGTGGCAGTTATGACACATCTCCATGAGCAGGGAAGTACAAAGAGGCACTGACCTGAAGTGGGACAGCTTGTAGGTTGGTGGTGGTGGTGG  
AGCAGATGGAAGGTTAGGAGTTAAGATTCTGCATTTCTCACAATGGACCCCATTTCTACCCTTGAAGTTGCTGTAATGATGAGGAAGGAGGTAG  
GGAGGTTGAAGGCGAGTACCACATTTAAAGAAAAGATGACTTACAATTTAGAAAGTTACATCCCATGTAATTTCTAATAATATCTCTCTCTCTCT  
CTCTCTCTCTCTCTCTCTCTCTCTCTCTCTCTCTCTCTCTCTCTCTCTCTCTCTCTCTCTCTCTCTCTCTCTCTCTCTCTCTCTCTCTCTCTCT  
GGTGCACCTGCTTATCCAGAGGGCAGAGAAGGACAGTGTGCTGCTTCTCTGCTCTCTCTCTCTCTCTCTCTCTCTCTCTCTCTCTCTCTCTCTCTCT  
GGCACTGCTTCTTTCAGTGGACTGGTGGTGGTGGTGGTGGTGGTGGTGGTGGTGGTGGTGGTGGTGGTGGTGGTGGTGGTGGTGGTGGTGGTGGTGG  
AGAGGGGGAGGGAGAGAACTGAAATTAGATGAGATTGTGACACACAGGTTTTACATGGGTACCAGCGATCCAAATGAATCTTCTTACTACTCGCAT  
AGAAACTCTTACCCTAAAGGCTCTCCAGCCCTCAGTATAGTCTTTCAGATGGGAATTAATCTTCTTACCCTTCCATATACCAGAAAAT  
AAGAGTTAAAACTCAGTAGTTTATCAAAAATTTCAACCCCTAAGTACAGAAAACAAAGCTCAAGCCAGGTCATCTTACCCACACAGCTAACAC  
TTTAGGCTACCCTGTGATGACTAGTATGAGTGTGAGCTGCTCAACTGGTCTGTTCTCAAAAATCTTACACACAGTCTGACTTGTTCACCACTTGTTC  
TCCTTGGCAAGCCTCATGCAAGGTGCCACGTGAGTATATCTCCGAGTCTATATAGAAGGAGTGGTCACTGAAATCTGGAAGGCAGCAAAAGGCCA  
CAGATGCCAAAGAGGCAGAGAAAGTTCAGGATCTGACCTAACCACTTACCTGATGATTGCGAAGCAGAAACAGGGCAAGCCTCCAAAG  
AGTGTAGATCCCAAGATTCTATAAGCTGGTCCCTCCCTCAGTCCCTGAGTGTGGTGTAGAGATGGTCTGGGCGCAAGGACTACAACAGAGCTC  
ACAGAACTCTGACACTAGCTATAGATTGTTGAAGTCACTTGGCCATAACAATGACAGCTGTCTTCTAAGTATGCAACAGGCTGAGATGAGAAAG  
GAATGTGAAATCACTTGAAGAGACTACAATGCTGTACACAGCAGGGCTCCCTGGCCCTGTGATGTAACCTTCCAATGCCATGGTCACTACAGATA  
CACCTCAGGTTAGTCACTTACCTGCTCCACTCACTTACCTGCTGGCTAGTGTCTTCAATAGAAAACAGAAGCTGGCAGGAACCTGGAGAG

TGTTTCATCTATGTTTCATTATCAATCAATCAAGCTTTGGTCCTAAGCTACCCCAAATGCCCCCTACACACAGAGATGGTATAGGGAGAGAAGGGAGGAAAGA  
AGGAGGGAAGGAGGGAGGGAGGAAGGGAGGGAGGGAGGGAGGGAGGGAGGGAGGGAGGGAGGGAGGGAGGGAGGGAGGGAGGGAGGGAGGGAGGGAGGGATGGAT  
GCTAGAGAGAGGGAGTTTCTACTGAAAATTATTCATTTGATTTAGAGCTCAAACTTCCACTGGCTAGTGTCTTCTAAATTTTCTGTGATGTGGAAACA  
CTGGCAAACACAGCAATAGATAACAATCTCTCTCTGCCAAGCATTTCACACATGTATCACACTAATCTACCTCAAAGATCTCCTTCCAGATAAGGGG  
CTCCAGTCTTGAAGAAGACATTGTAGATCAGCCACCCTGCCTCTGCTTTTATGTTCTCTGAACGCCATCCAGACCTCAACAATTGACAGAGAAGAG  
CAGAGCTTTGGCTGGGTCAAAAGATGTAACAGAGAGGGTTTTAAGAAAATGACTTACTGTTGGATGCAGAAAAGAGGATTAAGAGTGGCAATGG  
GTGTGGAAACATGCTGGATAAACTGACGGACATCACATGGATTACAATACTTTTCAATATCAAGGAGCATTAACTTTCTCTTTTGGAGACCACCTT  
AAGCCCTGTGTTTCTAGGTCTTCTACTCTGAGACAGTTTGGCCCTCATCACTAGGATCATTTCTCATACTTTATTTTAACTAGTAGATGGTGTGTA  
CAAATCAGAGGAGCAAACAGTGCCAAGGAATGATTGCTGCTGAAAACACCACAGCATTCTCCTCCCAAGCTATTGCTAAAATCATTGCTTAATCCACT  
GCTATACTTGCCTCAACAGTCAAGAGCCAGTGAATCCTACCTTGACTCCCATATAATGAATTCCTTCTTCTTACAGCGTCCAGTGGGTAGCAAAGA  
CTGGGGTCTTTCATGCTGTCTTCTGACTCCCTAGAATGGATGTGTAGCTGGAAAGAAATGGAGGTGTCTGGTCAATTTTGTAACTCCGATGAA  
ATCCATGAAGAGCCAGGCTATGCCACAGACTTTGACCCAACCCGGCCATAGCGGCCATTTAAATGGCGCGCCGGATCCGAATTCCTCGAGGCTAGA  
AGCGATAAGCTTCAGAG;G::ATCAATTCCGCCCTCTCCTTCCCCCCCCCTAACGTTACTGGCCGAAGCCGCTTGAATAAGGCCGGTGTGCGTTTGTCT  
ATATGTTATTTTCCACCAATTGCGCTCTTTGGCAATGTGAGGCGCCGGAACCTGGCCCTGCTTCTTGTGACGAGCATTCCTAGGGGCTTTTCCCTCT  
CGCAAAGGAATCAAGGTGTGTAAGTGCTGAAGGAAGGCTTCTCTGAAAGTCTTGAAGACAACAACGTCTGTAGCGACCTTTTGCAGGC  
AGCGAAACCCCACTGGCGACAGTGCCTCTGGGCCAAAAGCCAGTGTATAAGATACACTGCCAAAGCCGCAACCCCAAGTCCAGTCCGTTGTG  
AGTTGGATAGTTGTGAAAAGAGTCAAATGGCTCTCCTCAAGCGTATTCAACAAGGGGCTGAAGGATGCCAGAAGGTACCCATTGTATGGGATCTGA  
TCTGGGGCTCGGTGCATGCTTTACGTGTGTTAGTTCGAGGTTAAAAAACGTTAGGCCCCCGAACCACGGGGACGTGTTTCTTTGAAAAACA  
CGATAATACCATGGCGGATCCCGTCTTTTACAACGTGCTGACTGGGAAAACCCCTGGCCTTACCAAATTAATGCCTGTCACATCCCCCTTTCCG  
CAGTGTGCCTAATAGCAAGAGCCCGCCAGCGATCCGCTTCCCAACAGTTGCGCAGCTGAATGGCGAATGGCGCTTTGCTGCTTCCCGCACAG  
AAGCGGTGCCGGAAGCTGGCTGGAGTGGCATCTTCTGAGGCCGATACTGTCGTGCTCCCTCAAACCTGGCAGATGCACGGTTACGATGCGCCCATC  
TACACCAACGTAACCTATCCCAATACGCTCAATCCGCGCTTGTTCACCGGAGAAATCCGACGGGTTGTTACTCGCTACATTAATGTTGATGAAAGC  
TGGCTACAGGAAGCCAGCGCAATTAATTTGTAGCGGTTAAGTCCGCTTTTCTATCTGGGTGCAACGGGCGCTGGTTCAGCCGAGGACAGCAG  
TCGTTTCCGCTGAATTTGACTGACGCAATTTTACGCGCCGAGAAAACCCCTCTGCGGTGATGGTGTGCTGCTGCTGAGTGGAGTACTGCGATTA  
AGATCAGGATATGTGGCGGATGAGCGGCAATTTCCGTGACGTCTCGTTGCTGCATAAACCGACTACACAAATCAGCGATTTCCATGTTGCCACTCGCTT  
TAATGATGATTTACGCGCGCTGTACTGGAGGCTGAAGTTCAGATGTGCGCGGAGTTGCTGTACTACCTACGGGTAACAGTTTCTTTATGGCAGGGTGA  
AAGCAGGTCCGAGCGCCACCGGCTTTCCGGGCTGAATTAATCAGTGAAGCTGCTGTTTACTGACTGCGCTACACTAGCTGTGAACGTGAAA  
ACCCGAAGCTGTGGAGGCGCAAATCCCGAATCTCTATGTCGCGTGGTGAAGTGCACACCGCCGAGCGACGTTAAGCAGAGAAGCGCGAT  
GTCGGTTTCCGCGAGGTGCGGATTGAAAATGGTCTGCTGCTGTAACGGCAAGCCGTTGCTGATTCGAGGCGTTAACCGTCACGAGCATCATCTCTG  
CATGGTCAGGTCATGGATGAGCAGACGATGGTGCAGGATATCCTGCTGATGAAGCAGAACAATTTAACGCCGTGCGTGTTCGATATCCGAACCA  
TCCGCTGTGGTACACGCTGTGCGACCGCTACGGCCTGTATGTGGTGGATGAAAGCAATATTGAAAACCCACGGCATGGTGCCTGCAATGAATCGTCTGAGG  
ATGATCCGCGCTGGTACCGGATGAGCGAACGCGTAAAGCTGCTGAGGCTGTTGCGACGCGATCGTAATCACCCGAGTGTGATCATCTGCTGCTGGGAA  
GAATCAGCGCCAGCGCTAATCAGCAGCGCTATCGCTGGATCAAATCTGTCAGTCTTCCCGCCGTTGCGAGTGAAGGCGCGGAGCCGACAC  
CACGGCCACCGATATTATTTGCCGATGTACGCGCGCTGGATGAAGACCAGCCCTTCCCGGCTGTGCCGAAATGGTCCATCAAAAAATGGCTTTCCGCT  
ACCTGGAGAGACGCGCCGCTGATCTTTGCGAATACGCCACCGCATGGGTAAACAGTCTTCCCGGTTTCGCTAAATACTGGCAGCGCTTTCGTCAGTA  
TCCCCTTTACAGGCGGCTTCTGCTGGGACTGGGTGGATCAGTCTGCTGTAATAATGATGAAAACCGCAACCCGCTGGTTCGGCTTACGGCGGTGATTT  
TGGGATACCGCGAACGATCCGCAAGTCTGTATGAACTGCTTGTCTTTTGGCAGCCGATCCAGCCATCCAGCGAAAGCAACCCAGCAGCAGC  
AGTTTTTCCAGTTCCGTTTATCCGGCAAAACCATCGAAGTGACCAGCGAATACCTGTTCCGTCATAGCGATAACGAGCTCCTGCACTGGATGGTGGCGC  
TGGATGGTAAGCCGCTGCAAGCGGTGAAGTGCCTCTGGATGTGCTCCACAAGGTAAACAGTTGATTGAAGTCTGCAACTCCGCAAGCCAGCCGAGAGC  
GCCGGCAACTCTGGTACAGTACCGCTAGTGAACCGAACCGCCGATGGTTCAGAAAGCCGGCAGCATCAGCCGCTGGCAGCAGTGGCGTCTGG  
CGAAAACCTCAGTGTGAGCTCCCGCGCTCCACCGCATCCCGCATCTGACACCAGCGAAATGGATTTTTGCACTGAGCTGGGTAATAAGCGTT  
GGCAATTTAACCGCCAGTCAGGCTTTCTTTCACAGATGTGGATTGGCGATAAAAAACAATGCTGACGCCGCTGCGGATCAGTTACCCGTCGACCCG  
TGGATAACGACATTGGGTAAAGTGAAGCGACCCGATGACCCTAACCGCTGGGTTCGAACGCTGGAAGGCCGCGGGCCATTACCAGGCCAAGCAGC  
GTTGTTGCACTGACCGGACAGTACACTTGCTGATGCGGTGCTGATTACGACCGCTACCGCTGGCAGCATCAGGGGAAAACCTATTATCAGCCGGA  
AAACCTACCGATTGATGATGGTAAAGTGGTCAAATGGCGATTACCTGTGATGTTGAAGTGGCTAGCGATACACCCGCTCGGCGGATTTGCCCTGACTGC  
CAGCTGGCGCAGGTAGCAGAGCGGGTAAACTGGCTCGGATTAGGGGCGCAAGAAAATCTCCCGACCCCTTACTGCGCCGTGTTTTCAGCCGCTGGGA  
TCTGCCATTGTCAGACATGTATACCCGTAAGTCTTCCCGAGCGAAAACGGTCTGCGCTGCGGGACGCGGAAATTGAATTAAGCCACACAGTGGC  
GCGGCGACTTCCAGTTCAACATCAGCCGCTACAGTACACAGCAACTGATGAAAACCCAGCAGCTGCCATCTGCTGCACCGGAAGGACGACATGGCTG  
AATATCGACGGTTTCCATATGGGATTGGTGGCAGCAACTCTGGAGCCGTCAGTATCGCGGAATTCAGCTGACGCGCGGTCGTAACCAATGCA  
GTTGTGTTGTTGAGGATCCCGCGCTGACGCAATAATGGATCGGCAATGAACAAGATTGGATTGCAAGCAGGTTCTCCGCGCTTGGGTTGG  
AGAGGCTATTGGCTATGACTGGGCACAACAGACAATCGGCTGCTGATGCCCGGCTTCCGGCTGTCAGCGCAGGGGCGCCGGTCTTTTGTCA  
AGACCGACTGTCCGCTGCCCTGAATGAACTGCAGGACGAGGACGCGCGGCTATCTGCTGGCCAGCAGCGGCGTTCCTTGGCGAGCTGTGCTCGAC  
GTTGCTACTGAAGCGGAAGGGATGGTGTGCTATTGGCGGAAGTGCAGGCTCCGGGGCAGGATCTCCTGTCTACCTTGTCTGCCGAGAAAGTATCCATC  
ATGGTGTAAATGCGGGCTGCATACGCTTGTATCGGCTTACTGCCATCCGCTTCCGACCAAGTTCAGCCAAACATCGCATCCGCTAGCAGTCCGAT  
GGAAGCCGGTCTTGTGATCAGGATGATCTGGACGAAGAGCATCAGGGGCTCGCGCCAGCCGAACTGTTCCGCAAGGCTCAAGGCGCGCATGCCCGAC  
GGCGAGGATCTCGTGTGACCCATGGCGATGCTGCTTGCCGAATATCATGGTGGAAAATGGCCGCTTTTCTGGATTATCGACTGTGGCCGGCTGGGT  
GTGGCGGACCGCTATCAGGACATAGCGTTGGCTACCCGTGATATTGCTGAAGAGCTTGGCGGCGAATGGGCTGACCCTTCTCTGCTTTACGGTATC  
GCCCTCCCGATTGCAGCGCATAGCCTTCTATCGCCTTCTGACGAGTCTTCTGAGGGATCAATTTCTAGAGCTCGCTGATCAGCTCAGCTGTGC  
CTTCTAGTTGCCAGCCATCTGTGTTTGGCCCTCCCCGCTGCTTCCCTGACCCTGGAAGGTGCCACTCCCACTGTCTTCTTAATAAAAATGAGGAAAT  
TGCATCGCATTGTCTGAGTAGGTGTATTCTATTCTGGGGGTGGGGTGGGGCAGGACAGCAAGGGGGAGGATTGGGAAGACAATAGCAGGCATGCT  
GGGGATCGGGTGGGCTTATGCTTCTGAGACGGAAAAGAACAGCTGGGGCTCGATCTCTAGAGTTCGAGTACCGGGTATGGGGAGGCGCTTTTCCAA  
GGCAGTTGGAGATCTCGCTTAGCAGCCCGCTGGCACTTGGCGTACACAAGTGGCCCTTGGCCTCGCACATCCACATCCACCGTATGGCGC  
CAACCGCTCCGTTCTTGTGGTGGCCCTTCCGCGCAACTTCTACTCTCCCTAGCAAGGAAAGTTCGCCCGCCGCTGCGCTGCTGAGGACGT  
GACAAATGGAAGTAGCACGTCTACTAGTCTCGTGCAGATGGACAGCAGCCGCTGAGCAATGGAAGCGGGTAGGCCTTTGGGGCAGCGGCAATAGCA  
GCTTTGGCTCCTTCGCTTCTGGGCTCAGAGGCTGGGAAGGGTGGGTCCGGGGCGGGGCTAGGGGCGGGGCTAGGGGCGGGGCGGGCGCCGAAG  
GTCCTCCGGAAGCCCGCATTCTGCACGCTTCAAAGCGCACGCTGCCGCGCTGTTCTCTCTCTCTCATCTCCGGGCCCTTTGCACCTGCATCGCGC  
CAGTTACCATACCGAGTACAAGCCACGGTGCCTGCCACCCGACGAGCTCCCAAGGAGGCGGTACGACCCCTCGCCGCGTTCGCCACTA  
CCCCGCCACGCGCCACACCGTTCGATCCAGACCGCCACATCGAGCGGGTACCAGACTGCAAGAATCTTCTCACGCGGCTCGGGCTGCATCGGCA  
AGGTGTGGGTGCGGGACGACGGCGCAGCAGTGGCGGTCTGGACCAGCCGGAGAGCGTCAAGCGGGGGCGGTGTTCGCCGAGATCGGCCCGCGCAT  
GGCCAGTTGAGCGGTTCCCGGCTGGCCGCGCAGACAAGTGAAGGCTTCCGCGCCGACCCGGCCAAAGGAGCCCGGCTGGTTCCTGGCCACC  
TCGGGCTTCCGCGCAGCAGGAAAGGGTGGGACGCGGCTTCCCGGAGTGGAGGGGCGGTACGCGCGGCTGCGGCGGCTGCGCGCTTCCTG  
GAGACCTCCGCGCCCGCAACCTCCCTTCTACGAGCGGCTCGGCTTACCGTACCCGCCGACGCTGAGGTTGCCGAAAGGACCGCGCACTTGGTGCAT  
GACCCGCAAGCCCGGTGCTTGCAGCCCGCCACGACCCGACGCGCCGACCAGGAGCGCACGACCCATGCAATGATGATCTAGAGCTCGCTG  
ATCAGCCTCGACTGTGCTTCTAGTTGCCAGCCATCTGTTGTTTGGCCCTCCCCCGTGCCTTCTTGCACCTGGAAGGTTGCCACTCCCACTGCTCTTCT

AATAAAAATGAGGAAATTCGCATTGTCTGAGTAGGTGTCAATTTCTATTCTGGGGGGTGGGGTGGGGCAGGCAGCAAGGGGGAGGATTGGGAAGA  
CAATAGCAGGCATGCTGGGGATGCGGTGGGCTCTATGGCTTCTGAGGGCGAAAGAACCAGCTGATTACCCTGTATCCCTACTCGACCTCGAGGGCGC  
GCCATTTAATGGCCAGCGAGGCCATTAGCCACGCCCTTGACATAGACCTATGGATGTTACCTGTTAGTATGAAAAGTTCAAGGCCAAGCCTGCCAGG  
CCTAGTGAATCAGAATCTACCTTTTAAACATAAGAAAGATTAAGAAGTGCGGGGTTTGTCTTCTTTAAATGACATATATTTAAAAGACCAGAACTGGGC  
TGAGGAGGTGGATAATAGACCTGCTTGCCATGTAATGCAAGGACCTAAGTTTGAATGCCCAATACCTACATACAGGCTAGGCAGGGATGGCCTAGTG  
ATCCTGTTACTAAGGAGACAAAAACAGGAGATCCAAAAAAGAACTGGCTAGCTAGAGTAGCCCAAATGCCAAGTTTCAGTTACAATAAGAGATCTTG  
CCTCAAAAACATGAGATGAAGAGGTGTTGAAGAAGACACCTAACATCAGGCTTTACATTAECTACAGACATGCACACCACATATGCAAGTAAAAAAA  
ATACATACAAAAATAAAATTTAAGTAATATAAAAAAGTCAGAGCTGTAGCAATGAATATAAATGACTTGCTTATTTACTGACACCTGTTTAGCGTTGCATAA  
GCTAAGTCCATTACTGAGCTCGTATCACTGCCTCCCACTATAAACCCTGTAGAGCAGGCTTGATTATGTCTCTGTTGCCAGCCTGTCTGGTAGAAATGAGC  
ATTTTCTAAAGTAGTTGTGCCCTTCTTTTGGTACGAACTATTTTCATACCCTAAGGTCACACAGAAACAAGGGAAGTCAATCTCCTGCCTTTGAATCT  
TGCTTTCTTGCCCTTAATGAAGAGGGTGTGAATCAATTGTGGAAAGAGTAAAAAGAGTTTGAATTTGGCTTTCAACCACACTTGCTCCTAGATCTCCTC  
CCAATTCATAGATATTGTACATGCCCATCCCCTTGGTCCCCAGCCCTTTCCTTAAACAGTGGGCATGAAAAACACTCTTTAATGCTTTTATCTGGCCC  
ACATCCAGGGAGCAGGTCAGACACTGGAGATCCTAAAAATGGGTGAGAAAATGTACCAGAGGACAGCTCTAGGATCATAGACCTGTCTGCCTGCCTTGG  
GGTTCATCTCCCATTAGGATAACCAGGAATTTGGCAAGAGCCTGAGGAGCAGCTGGAGCAGAAAAGCAGGATGTGTCCAGAGGTCAAGCTTACC  
AGGATCAGCTGTGTTGAGCTGACCTGAATTTGAAACTGGCTTTCTCAAGAGAAGCTTACAGTTTGACTAACCCCAAGCTTCCAGGATAACCAAGTAA  
GAATCAGAATCTGAAAGGATAGGAAAAGAGCCTTACTCTGCCCTCTCAACCCACTCCTCAAGTAAAACAAAGCTTGTGCCTCCCTCTGCCAATA  
CCCAAATTTAACCTATAACAAAGGTAACCTCAGTGAAGGGCAATGCCCTGGGGCCTAAGTCACTGCTCAGCCATCGTGAGCAGGTAAGCTGGAA  
ACCCAAGAGAACTGGTAGCATAAGTCCAGCTTGGAGGTTGGCAGTTTTCAAAAACCAAGTAGAGTCTCAAATGCTTCTTTGTGCATTGGATTACAGTG  
AGCACTGGAACCCCAACTGGACCAAGTGCAGAGAAATAAGTTTGGTGGAGTGTCTAACCATGAATGAGATAACATGCATCACCCTCCAGAGG  
TCAGGGACATCTCAAGGAGGGTGGTAATACTGCAAGCAGGAAAGACCAAGGCAAAACAGTCTCCTCAAACATGCACAGGACCGCCACACTTGTGA  
GCCACAGCAGCTGTGCTTGGCTACCCAGGCTGTCTTTCAACCTTTCAGTATAGAGTGAACAAGAACTCTATGATCCCTACTCTACCTGATGAGCTATG  
GACAGATGGTGGTTGTAGAAAAGGGAGTCAGTTTTCTTAGGGGTGTGGTCCCTGGTAAAATGACTGTGCTCCAGTGCCTGGCCCCACACCATTCCATA  
TATGGGCATCCCAACAACACTCAGTGGGAGATAGATGACAGATAGATGATAGATAGATAGATAGATAGATAGATAGATAGATAATAGATAAATA  
GATAGATAGATAGATAGATAGATAGATAGATAGATAGATAGATAGATAGATAGATAGATAGATAGATAGATAGATAGATAGATAGATAGATAA  
CTTTATGAATGCTTTCTTTGAAATAAATTGACAGTTACAGAAAGAACTTGCCTTTATAGTCCCAGTCAGATCAGACCCCTCAGCACAAAGTAAACTGAG  
TCTAGGGACAGCATAAAGTTGATCAATGAGCTGGGGAAATCTGTGAGACAATAGAGTGTCTTAAAAGCACAAAGAAAATGAGTCCAATACCCAGAGC  
CCATGTTTTTAAAGTCCAGGGTGGTGGCACACACTGGTAAACATCAGTGTGAGAAGGCAGCGGCAAGCTGATCCCTGGGCTCTCTGTGACCCAGC  
CTAGCCTACTTGGCATGTTCAGAGCAGTGCAGAGCCTAACCTAACCTAAAAAAGAAAGAAAAGGAGACAATATGAGAAATGACATCAGACTTATC  
TTCTGGCCTCCACAGGTAAAAAGAACACATATGCACAAAAGCACACACATACACATAAGATAATCAAACCTACCTGATGTAGGATGCAGAGTGTAGCCA  
GAGTTTGGATACTATCACAATTAATAACCAACTGTTGTGTTTTAGCTGCTATGCATGGGTGGTTTTTATCTCAAATTAATTACTACAAAGCAGATATTAT  
TTCCATTTAACTGGTGAGAAATCGAATCTTCAAGAAGTTTAGTAATATTTTTCTGTGACAGAGCCACTCAGTGAAGGGAAACACCAAATTTGGCAGATG  
TGACAATAGCCAATTAATCTCTCTCACACCTCTGGGTGAGAAACCTAATACCTGTGTGTAAGCTCAATGCTTCCCCTCCAGCCAACTAAAGGT  
GTTGTACCATGCTCTCGTCTCGTTCCTTCCCTGAGGTTCTGGGACATTGGCAGGGCTGGTTAGAGTCAACTCTGTGTGCCAGTCCCTCTGCTCCAGCT  
TTGTATCTTTTGGTCTGGGAAGGGGGATTTTACAAGACTGCATCACAAACCCTGGGCACAGACCTGTGCTCCTCACAGGTTCTCAGAAGCTGGCCCTG  
CTGGGCTACTCTGCCTTCCCAAGTCTCAAATAGGAGTGCACAAGCTGGTGCAGGAGTAAGTTAGGCGGATGCTTTCAGTCAAAAGTGACAGAAACT  
AGCCAGACTGAATCCATTTTGTTCAGATTTGACGGCTCCCAGAACTGAGAACTGCCAAGAGGAAGGCCAAGAATGGGGTGGTGGCATCTGGGGTCTT  
AAACTCCACTTTAGAGCTTGTGATTTCTCCTCTATGTTCTGTGGATGGCTTCCCTGATGCCCAGAGTGAACAATCTGTGAGGACAGGGAGACAGGA  
GACTAGCAGCCCTCAGTTCACAGCTTTATCCTTACTTAAAGCAGAGAGAGAGAGAGAGAGAGAGAGAGAGAGAGAGAGAGAGAGAGAGAGAGAGAG  
GTATAAATAATGCTCTTATGAGCTGATTCCCTCGTTTAAAAATGTTAATGTTTAAAAGGTGGGTTTTTTTTTGTATCCAGTTATATTTCAAAGTGACTGTTAT  
AGTATATGGTAGATATTTAATACTGTGTTGAGTTAATTAATTAATTCCTTTAAGCTCTTTTCTAATTAACCCTAAAGAAAACAACTGAECTCAATGGTAGAT  
CCTGAGAGCTCACAGGCAGACAGCGTAACCAAAAACAGGGAGGATTTTCTCAGTGAGAGAAAAGTACTTGCCTGCCCAGGTGCTGCTTCTCCCTTGC  
GGTGTCCAGGGCTCATTGTACACCAAGCTAGACTGGAAGTAAAGAAAGCTTCGCCCCCTGGATGTGTGACACCACACATCCCTGCAGTGTGTGAGGGG  
AGAAACAGCTCCAGGTTTATGTAACATCTCTGTTTATTGGGGTGAATAAGGGTCTCTAAACCTTGGGAGTGGGAGAGATTGGGGTAAGT  
ATACATCATTGGCTGGGCTGAGATGCTGGGAACACTTCATTGCTTGAGGAGAGATTCCAGGTGCTTGTGGACACGCTCTTATATAGGAAAGAGGAAG  
TTAAACTGTACTTTGGGACTCCTCAAGGGTGGTAGAGGTAGGTTGATAGAGTACGTGTAAACAGGACATATAGGCCAGGACAAAGGAAACA  
GTCCTATTCTGCCAGTCTAGGGATAACGTTTTTTCAGGGTTCTCACTCACTCATGCTTCAAACTGGCTTCTTCTATCTCATGACTTTCTGGGCCTA  
CACTGCTCAAAAATAACAAGGTGGAGAGCAACAGAGGAGACACTCAGCATCCTGCTCTGCTCTGGCTCTGCATGTGTGTGACTGCGAGCGCTGCACA  
CTCAGCTGTATGTGCCACATGTACCAGCAAAATACATCAAAACAAGGGCACCAAAATCTTGAATAATATCAAATGCAGGAGATGATCAATGCAGGTGGTG  
TATTTATGTGGCTCATTTTTACTATTTTTATTGTTATGATGTCCAAAATGTTTGAATAGAAAATTTCAAATCTCTAGTTTCCACTGAGAAATGAGATG  
ATGGTTATGTGCTGGCTGGTTTTTGTATCTTGCACAAAGCTTAAAGGTAGGTGACTGGGGAGAAAGAGCTTATGTCAGAAAATGCCTCCATCGAATTGGCC  
TGTAGGCAAACTGTCAGGGCATGTTCTGACTGATGATTAATATGAGAGGACCAGCCCTCCTGGACAGTTTAAAGAAAGCAGGCTGAGTAAGCTACAG  
GGAGCAAGTCAAGTAGGCAGCGTTCCCTCCATGACTTCTGCTTCAAGTCCCTGCCTCAAGTCCCTGCCTTGGATTCTGCTTGGCTTCTTGTATGGTGA  
TTATAATCTGTAAACAAGCCAAATAAACCTTCTCCCTCAAGTTGCTTTTTGGTCTTGGTGGCTATCACAGTAAACAGAAAACCTAAGACAGGCCACCCAGA  
GAAGCACAGAGAGAGAGGAGGCTGCCCTCCTCCCTGCTGGGGTCCCTAACCTGACTGCAGAGGGTGGGTCTGGGTTGGAGACACTATAACAGT  
AAGTAAGTAAAACCTCCTCCCGAGAGTTGCCAGCTGCCTGCTGATGCTGAAGTAGTTTTTGTCAACTGAGGCAGGAGATGTGTCCACAAAAGAGCTCAA  
GTTGTGTTATGTGCCCTTTGTGTATAGAGCGACTTACTGTCATGGAGTCTACAGCTCTGTAATAAGTGGGAAGGAACTTTCTATAAGAGAAGGATCCCA  
CAGGACTCAGTCAAGACTCAGAAGAGCAAGAAGAGGGAAACCAAAAGGCAGCTGAAGGCCTCTCTGAGGACCCAGCCACATCTTCCGAGGGCTTTT  
CTCAAGGACTTCCCTTCAAGAGGCTCAGGACTAACAACTGGTGGTCTCTCTCTTCAACCATGGCTATCTGCATTGCTACCGGCTGG



# Kcna10 Targeting Strategy

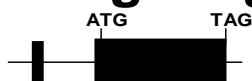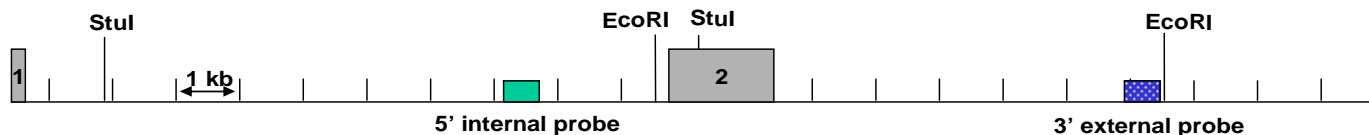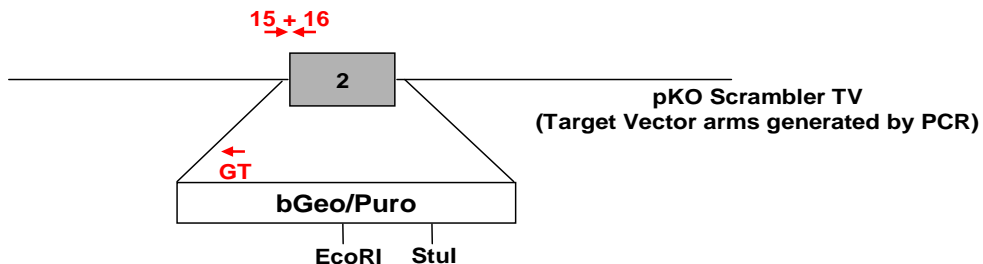

## Southern Strategies:

| Probe    | 5' internal | 3' external |
|----------|-------------|-------------|
| Enzyme   | Stul        | EcoRI       |
| Wildtype | 9.7kb       | 7.8kb       |
| Targeted | 14.2b       | 8.7kb       |

## PCR Strategies

| Strategy | WT-specific | Mutant-specific |
|----------|-------------|-----------------|
| Primers  | 15 + 16     | 15 + GT         |
| Wildtype | 246 bps     | -----           |
| Targeted | -----       | 404 bps         |

# Kcna10 Southern Data

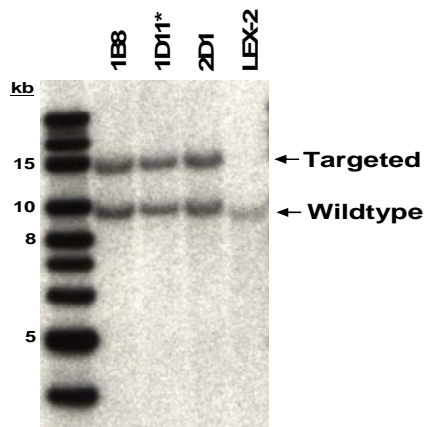

**5' internal probe**  
Stul digests  
Wildtype 9.7kb  
Targeted 14.2 kb

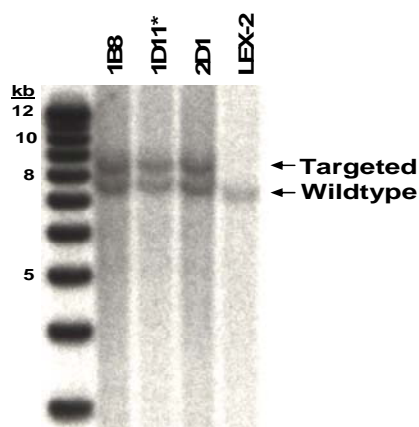

**3' external probe**  
EcoRI digests  
Wildtype 7.8 kb  
Targeted 8.7 kb

\*Clones achieving germline transmission
